# Supplementary material
Source: PubMed Central journal article supplement (PMC8564629)
Supplement: NIHMS1750888-supplement-Supporting_Information.pdf [file NIHMS1750888-supplement-Supporting_Information.pdf]

Electronic Supplementary Information for  
**Selective fluorination of the surface of polymeric materials**  
**after stereolithography 3D printing**

Megan A. Catterton, Alyssa N. Montalbino and Rebecca R. Pompano

University of Virginia  
Department of Chemistry

Contents:

- Supporting Tables
- Supporting Figures

**Supporting Tables:**

Table S1: Printing settings used for each resin on the CADworks3D M50 printer with a 405 nm light source. For all resins, the peeling speed was Slow, and gap adjustment was 0.1 mm.

| <b>Resin</b>             | <b>Curing time (sec)</b> | <b>Base layers</b> | <b>Base curing (sec)</b> | <b>Buffer layers</b> | <b>Light power (%)</b> | <b>Rinsing solvent</b> | <b>Post-curing time</b> |
|--------------------------|--------------------------|--------------------|--------------------------|----------------------|------------------------|------------------------|-------------------------|
| <b>BV-007A</b>           | 1.15                     | 1                  | 9.0                      | 1                    | 75                     | MeOH                   | 20 sec                  |
| <b>Green master mold</b> | 5.00                     | 1                  | 40                       | 2                    | 100                    | IPA                    | 10 min                  |
| <b>Dental</b>            | 4.50                     | 1                  | 8.5                      | 3                    | 78                     | IPA                    | 30 min                  |
| <b>Plasclear</b>         | 10.0                     | 1                  | 22                       | 2                    | 78                     | EtOH                   | 2 min                   |
| <b>PEG-DA</b>            | 2                        | 1                  | 3                        | 1                    | 100                    | EtOH                   | 30 sec                  |

Table S2: The air/water contact angle for glass, PDMS, and BV-007A upon plasma treatment. N=2

| <b>Material</b> | <b>Plasma Treatment time (sec)</b> | <b>Contact angle (degree)</b> |
|-----------------|------------------------------------|-------------------------------|
| <b>Glass</b>    | 0                                  | 33 ± 2                        |
|                 | 5                                  | 12 ± 0.3                      |
|                 | 30                                 | 10 ± 2                        |
| <b>PDMS</b>     | 0                                  | 82 ± 5                        |
|                 | 5                                  | 24 ± 1                        |
|                 | 30                                 | 32 ± 7                        |
| <b>BV-007A</b>  | 0                                  | 59 ± 4                        |
|                 | 5                                  | 58 ± 7                        |
|                 | 30                                 | 57 ± 5                        |

Table S3: Power conversion for ambient light exposure. Light intensity was measured with UV-Optometer (SUSS MicroTec).

| <b>Light source</b> | <b>Power (J/s) at 405 nm</b> | <b>Equivalent Dosage Time<sup>+</sup></b> |
|---------------------|------------------------------|-------------------------------------------|
| Ambient light       | 0.09                         | 32 Days                                   |
| Light Box           | 734                          | 360 Seconds                               |

<sup>+</sup>Ambient equivalent exposure time was calculated from the following equation:

$$Time (Day) = \frac{Light\ box\ dose\ (J) * 1\ (Day)}{Ambient\ light\ intensity\ \left(\frac{J}{s}\right) * 86400\ (s)}$$

## Supporting Figures:

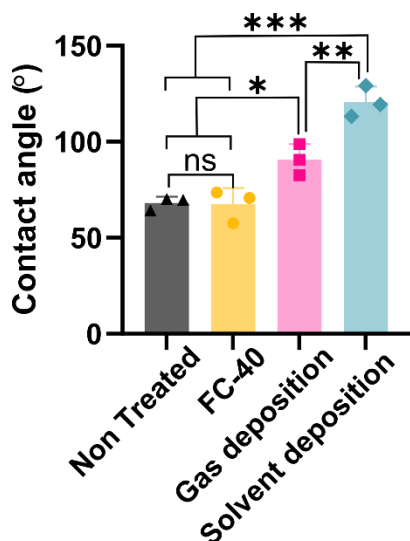

Figure S1: Air/water contact angles of BV007A after no treatment, immersion in FC-40 oil, or silanization by either gas-phase or solution-phase (FC-40 solvent) deposition ( $n=3$ , mean  $\pm$  std dev). The surfaces were not exposed to air plasma activation. One-way ANOVA with Tukey's multiple comparisons. (\* $p < 0.05$ , \*\* $p < 0.005$ , and \*\*\* $p < 0.0005$ )

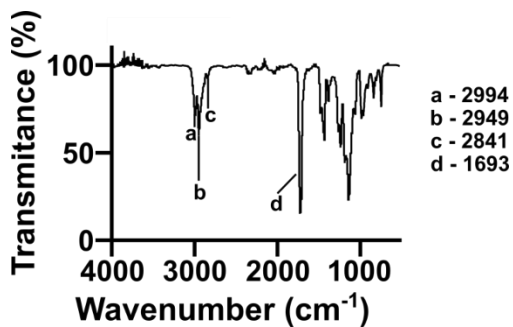

Figure S2: The ATR FT-IR spectra of a 1.5 mm acrylic sheet (McMaster-Carr, Princeton, NJ USA). Peaks a, b, and c were assigned to the  $sp^3$  C-H stretching in the polymer backbone. Peak d was assigned to the carbonyl group.

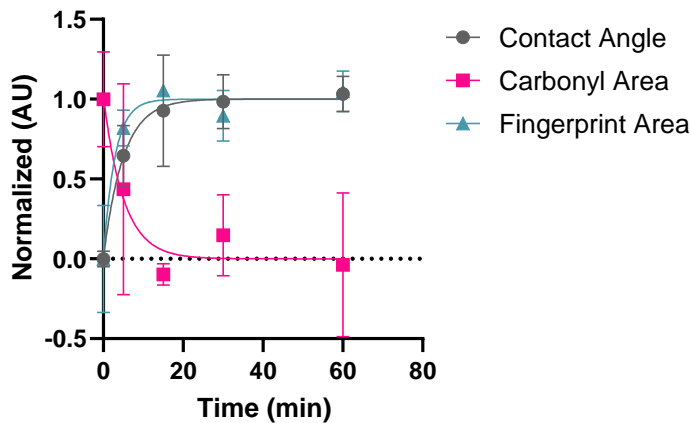

Figure S3: Normalized data of the contact angle, carbonyl peak area, and fingerprint area after various amount of time exposed to the fluoroalkyl silane. Data was normalized using the equation  $y_{normalized} = (y - min)/(max - min)$ , where  $min$  and  $max$  were the  $min$  and  $max$   $y$ -values of the original data, respectively (i.e. the mean value at  $t = 0$  and the plateau). The data were fit to one-phase exponential curves. Contact angle:  $y = 1 - 0.003e^{-0.2x}$ ,  $R^2 = 0.8437$ . Carbonyl area:  $y = 1e^{-0.2x}$ ,  $R^2 = 0.5109$ . Fingerprint area:  $y = 1 - 0.0006e^{-0.3x}$ ,  $R^2 = 0.8545$ .

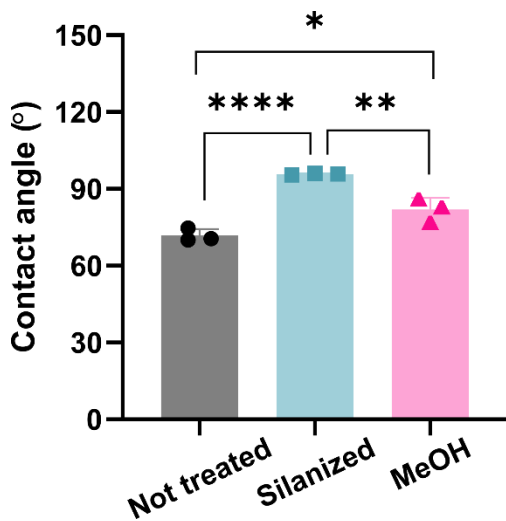

Figure S4: Air/water contact angles of acrylic (McMaster-Carr, Princeton, NJ USA) after no treatment, silanization by the optimized method, or silanization followed by immersion in methanol for 2 hr ( $n=3$ , mean  $\pm$  std dev). The surfaces were not exposed to air plasma activation. One-way ANOVA with Tukey's multiple comparisons. (\* $p < 0.05$ , \*\*  $p < 0.005$ , and \*\*\*\* $p < 0.0001$ )
